# Supplementary material
Source: publisher site journal article supplement (https://www.dovepress.com/get_supplementary_file.php?f=250200.docx)
Supplement: Supplementary file 1 [file get_supplementary_file.php]

**Supplementary material (supp 1)**

# This is the searching process during the identification and selection of studies for the study “Primary Resistance Pattern of *Helicobacter Pylori* to Antibiotics in Adult Population; a Systematic Review” 2017.

The searching process was as follows;

At Pubmed/Medline,

“(((((h.pylori antibiotic resistance AND ( "2015/01/01"[PDat] : "2017/12/31"[PDat] ))) OR (helicobacter pylori antibiotic resistance AND ( "2015/01/01"[PDat] : "2017/12/31"[PDat] ))) AND (helicobacter pylori Amoxicillin resistance AND ( "2015/01/01"[PDat] : "2017/12/31"[PDat] ))) AND (helicobacter pylori Clarithromycin resistance AND ( "2015/01/01"[PDat] : "2017/12/31"[PDat] ))) AND (helicobacter pylori Levofloxacin resistance AND ( "2015/01/01"[PDat] : "2017/12/31"[PDat] ))”, and

At Google scholar,

“<https://scholar.google.com/scholar?as_q=h.pylori+or+helicobacter+pylori+antibiotic+resistance+and+h.pylori+Amoxicillin++resistance+and+h.pylori+Clarithromycin+resistance+and+h.pylori+Metronidazole+resistance+and+h.pylori+Levofloxacin+resistance&as_epq=H.pylori+antibiotic+resistance&as_oq=&as_eq=&as_occt=any&as_sauthors=&as_publication=&as_ylo=2015&as_yhi=2017&hl=en&as_sdt=1%2C5&as_vis=1>”.
